# Supplementary material for: Comorbid diseases as predictors of survival of primary total hip and knee replacements: a nationwide register-based study of 96 754 operations on patients with primary osteoarthritis
Source: PubMed Central journal article supplement — Ann Rheum Dis. 2012 Dec 19;72(12):1975–82. doi: 10.1136/annrheumdis-2012-202064 (PMC3841739; doi:10.1136/annrheumdis-2012-202064), 2012-12-19
Supplement: annrheumdis-2012-202064-s2.pdf [file annrheumdis-2012-202064-s2.pdf]

**Online supplementary table S1.** Table showing how the Hospital Discharge Register and the Registers of the Social Insurance Institution of Finland were used to identify different comorbid diseases. Positive entry in any of the registers sufficed for registration of that comorbidity.

|                                    | <b>Data source</b>                                                                                                     |                                                                                                                                                    |                                                                             |
|------------------------------------|------------------------------------------------------------------------------------------------------------------------|----------------------------------------------------------------------------------------------------------------------------------------------------|-----------------------------------------------------------------------------|
|                                    | <b>Hospital Discharge Register</b>                                                                                     | <b>Registers of the Social Insurance Institution of Finland</b>                                                                                    |                                                                             |
|                                    |                                                                                                                        | <b>Drug Prescription Register</b>                                                                                                                  | <b>Drug Reimbursement Register</b>                                          |
| <b>Description of data sources</b> |                                                                                                                        |                                                                                                                                                    |                                                                             |
| Data registered                    | Treatment episodes in hospitals and health care centre wards (in-patient care) with specified diagnoses.               | Purchases of drugs prescribed by a physician                                                                                                       | Reasons for reimbursements issued for treatment for severe chronic diseases |
| Classification                     | World Health Organization International Classification of Diseases (ICD), 9 <sup>th</sup> or 10 <sup>th</sup> revision | World Health Organization Anatomical Therapeutic Classification for Drugs                                                                          |                                                                             |
| <b>Disease group</b>               |                                                                                                                        |                                                                                                                                                    |                                                                             |
| Cardiovascular disease             |                                                                                                                        |                                                                                                                                                    |                                                                             |
| Coronary heart disease             | Ischemic heart diseases (ICD-10: I20*-I25*; ICD-9: 410*-414*)                                                          | (Not used.)                                                                                                                                        | Chronic coronary heart disease.                                             |
| Atrial fibrillation                | Atrial fibrillation (ICD-10: I48; ICD-9: 4273*)                                                                        | Warfarin (B01AA03)                                                                                                                                 | Chronic heart arrhythmias.                                                  |
| Heart failure                      | Heart failure (ICD-10: I50*; ICD-9: 428*)                                                                              | (Not used.)                                                                                                                                        | Chronic heart failure.                                                      |
| Hypertension                       | Hypertension (ICD-10: I10*-I15*; ICD-9: 40*)                                                                           | Antihypertensives (C03*, C07* (without concomitant diagnosis of coronary heart disease of atrial fibrillation), C09A*, C09B*, C09C*, C09D*, C08*). | (Severe) hypertension.                                                      |
| Diabetes                           | Diabetes (ICD-10: E10*-E14*; ICD-9: 250*)                                                                              | Drugs used in diabetes (A10A*, A10B*).                                                                                                             | Diabetes.                                                                   |

|                            |                                                                                                                                       |                                                               |                                                                                                                                                                           |
|----------------------------|---------------------------------------------------------------------------------------------------------------------------------------|---------------------------------------------------------------|---------------------------------------------------------------------------------------------------------------------------------------------------------------------------|
| Cancer                     | Cancer.<br>(ICD-10: C00*-C99*, D00*-D09*; ICD-9: 140*-208*)                                                                           | Antineoplastic agents (L01* except methothrexate).            | Breast cancer, prostate cancer, leukaemia, gynaecologic cancer, other malignancies, or for use of certain specific expensive medications used in the treatment of cancer. |
| Pulmonary diseases         | Chronic obstructive pulmonary disease or asthma.<br>(ICD-10: J44*-J46*; ICD-9: 4912*, 496*, 493*)                                     | Drugs for obstructive airway diseases (R03*).                 | Asthma, chronic obstructive pulmonary disease or other severe obstructive airway diseases.                                                                                |
| Depression                 | Depression.<br>(ICD-10: F32*-F34*; ICD-9: 2960*, 2961*,2069*)                                                                         | Antidepressants (N06A*).                                      | (Not used.)                                                                                                                                                               |
| Psychotic disorders        | Schizophrenia, schizotypal and delusional disorders, or manic episode.<br>(ICD-10: F20-F31; ICD-9: 295*-298*, except 2960* and 2961*) | Antipsychotics (N05A except prochlorperazine and dixyrazine). | Severe psychotic disease.                                                                                                                                                 |
| Neurodegenerative diseases | Dementia (disorders) or Parkinson's disease.<br>(ICD-10: F00*-F03*, G20*, G30*; ICD-9: 290*, 3310*, 332*)                             | Antidementia drugs or dopaminergic agents (N06D*, N04B*).     | Alzheimer's disease, Parkinson's disease.                                                                                                                                 |

---
