# Supplementary material for: Comorbid diseases as predictors of survival of primary total hip and knee replacements: a nationwide register-based study of 96 754 operations on patients with primary osteoarthritis
Source: PubMed Central journal article supplement — Ann Rheum Dis. 2012 Dec 19;72(12):1975–82. doi: 10.1136/annrheumdis-2012-202064 (PMC3841739; doi:10.1136/annrheumdis-2012-202064), 2012-12-19
Supplement: annrheumdis-2012-202064-s3.pdf [file annrheumdis-2012-202064-s3.pdf]

**Online supplementary table S2.** Effect of comorbid diseases on survival of hip and knee replacements in patients with primary osteoarthritis. The survival rates are calculated with Kaplan-Meier survival analysis and are presented with accompanying 95% confidence intervals (CI).

|                                               |         | Survival rate |           |         |           |         |           |          |           |
|-----------------------------------------------|---------|---------------|-----------|---------|-----------|---------|-----------|----------|-----------|
|                                               |         | 1 year        |           | 3 years |           | 5 years |           | 10 years |           |
|                                               |         | %             | 95% CI    | %       | 95% CI    | %       | 95% CI    | %        | 95% CI    |
| <b>Hip replacements</b>                       |         |               |           |         |           |         |           |          |           |
| Cardiovascular diseases                       | With    | 98.2          | 97.9-98.5 | 96.6    | 96.1-97.0 | 95.5    | 95.0-96.0 | 91.2     | 90.0-92.3 |
|                                               | Without | 98.4          | 98.2-98.5 | 96.9    | 96.7-97.1 | 95.8    | 95.6-96.0 | 92.0     | 91.5-92.5 |
| Coronary heart disease                        | With    | 98.4          | 98.0-98.7 | 96.7    | 96.1-97.1 | 95.5    | 94.9-96.1 | 90.9     | 89.3-92.2 |
|                                               | Without | 98.4          | 98.2-98.5 | 96.9    | 96.7-97.0 | 95.8    | 95.5-96.0 | 92.0     | 91.6-92.5 |
| Atrial fibrillation                           | With    | 97.7          | 97.0-98.3 | 96.0    | 95.1-96.8 | 95.1    | 94.1-96.0 | 92.2     | 90.4-93.7 |
|                                               | Without | 98.4          | 98.3-98.5 | 96.9    | 96.7-97.0 | 95.8    | 95.6-96.0 | 91.9     | 91.4-92.3 |
| Heart failure                                 | With    | 97.6          | 96.7-98.3 | 95.7    | 94.5-96.7 | 94.7    | 93.4-95.8 | 90.8     | 88.2-92.9 |
|                                               | Without | 98.4          | 98.3-98.5 | 96.9    | 96.7-97.0 | 95.8    | 95.6-96.0 | 91.9     | 91.5-92.4 |
| Hypertension (without cardiovascular disease) | With    | 98.2          | 97.9-98.5 | 96.7    | 96.3-97.1 | 95.4    | 94.9-95.9 | 92.0     | 91.1-92.9 |
|                                               | Without | 98.4          | 98.2-98.5 | 96.9    | 96.7-97.0 | 95.8    | 95.6-96.0 | 91.9     | 91.4-92.3 |
| Diabetes                                      | With    | 97.9          | 97.2-98.4 | 96.6    | 95.8-97.3 | 95.5    | 94.5-96.4 | 93.0     | 90.9-94.7 |
|                                               | Without | 98.4          | 98.3-98.5 | 96.8    | 96.7-97.0 | 95.8    | 95.5-96.0 | 91.9     | 91.4-92.3 |
| Cancer                                        | With    | 98.2          | 97.6-98.7 | 96.0    | 95.1-96.8 | 94.6    | 93.4-95.6 | 90.4     | 87.5-92.6 |
|                                               | Without | 98.4          | 98.2-98.5 | 96.9    | 96.7-97.0 | 95.8    | 95.6-96.0 | 92.0     | 91.5-92.4 |
| Pulmonary disease                             | With    | 98.2          | 97.6-98.6 | 96.2    | 95.4-96.9 | 95.0    | 94.0-95.9 | 91.9     | 90.0-93.4 |
|                                               | Without | 98.4          | 98.2-98.5 | 96.9    | 96.7-97.0 | 95.8    | 95.6-96.0 | 91.9     | 91.4-92.3 |
| Depression                                    | With    | 96.8          | 94.8-98.0 | 94.3    | 91.8-96.1 | 92.7    | 89.7-94.8 | 89.1     | 83.7-92.8 |
|                                               | Without | 98.4          | 98.2-98.5 | 96.9    | 96.7-97.0 | 95.8    | 95.6-96.0 | 91.9     | 91.5-92.3 |
| Psychotic disorders                           | With    | 96.8          | 95.2-97.9 | 93.8    | 91.7-95.4 | 93.4    | 91.2-95.1 | 87.9     | 82.8-91.5 |
|                                               | Without | 98.4          | 98.3-98.5 | 96.9    | 96.7-97.0 | 95.8    | 95.6-96.0 | 92.0     | 91.5-92.4 |
| Neurodegenerative diseases                    | With    | 97.4          | 95.7-98.4 | 95.2    | 93.1-96.7 | 94.3    | 91.9-96.0 | 92.0     | 87.8-94.8 |
|                                               | Without | 98.4          | 98.2-98.5 | 96.9    | 96.7-97.0 | 95.8    | 95.6-96.0 | 91.9     | 91.5-92.3 |
| Any of the diseases                           | With    | 98.2          | 98.0-98.4 | 96.5    | 96.3-96.8 | 95.4    | 95.0-95.7 | 91.7     | 91.0-92.3 |
|                                               | Without | 98.5          | 98.3-98.6 | 97.0    | 96.8-97.3 | 96.0    | 95.6-96.3 | 92.1     | 91.5-92.6 |
| <b>Knee replacements</b>                      |         |               |           |         |           |         |           |          |           |
| Cardiovascular diseases                       | With    | 98.5          | 98.3-98.9 | 96.7    | 96.3-97.0 | 95.9    | 95.4-96.3 | 94.3     | 93.6-95.0 |
|                                               | Without | 98.9          | 98.8-99.0 | 97.2    | 97.1-97.4 | 96.4    | 96.2-96.6 | 94.5     | 94.1-94.8 |
| Coronary heart disease                        | With    | 98.5          | 98.2-98.8 | 96.6    | 96.1-97.0 | 95.7    | 95.2-96.2 | 94.1     | 93.2-95.0 |
|                                               | Without | 98.9          | 98.8-99.0 | 97.2    | 97.1-97.4 | 96.4    | 96.2-96.6 | 94.5     | 94.2-94.8 |
| Atrial fibrillation                           | With    | 98.3          | 97.8-98.7 | 96.2    | 95.5-96.9 | 95.7    | 94.8-96.4 | 93.4     | 91.7-94.8 |
|                                               | Without | 98.8          | 98.7-98.9 | 97.2    | 97.0-97.3 | 96.3    | 96.2-96.5 | 94.5     | 94.2-94.8 |
| Heart failure                                 | With    | 98.5          | 98.0-99.0 | 96.5    | 95.6-97.2 | 95.5    | 94.5-96.3 | 94.2     | 92.8-95.4 |
|                                               | Without | 98.8          | 98.7-98.9 | 97.2    | 97.0-97.3 | 96.3    | 96.2-96.5 | 94.5     | 94.1-94.8 |
| Hypertension (without cardiovascular disease) | With    | 98.6          | 98.4-98.8 | 96.8    | 96.5-97.2 | 96.0    | 95.6-96.4 | 94.5     | 93.8-95.1 |
|                                               | Without | 98.9          | 98.8-99.0 | 97.2    | 97.0-97.4 | 96.4    | 96.2-96.8 | 94.4     | 94.1-94.8 |
| Diabetes                                      | With    | 98.3          | 97.8-98.6 | 96.2    | 95.5-96.7 | 95.3    | 94.6-96.0 | 94.6     | 93.7-95.5 |
|                                               | Without | 98.9          | 98.8-99.0 | 97.2    | 97.0-97.4 | 96.4    | 96.1-96.6 | 94.5     | 94.1-94.8 |
| Cancer                                        | With    | 98.9          | 98.4-99.2 | 96.8    | 96.0-97.5 | 96.4    | 95.5-97.1 | 92.0     | 88.3-94.5 |
|                                               | Without | 98.8          | 98.7-98.9 | 97.2    | 97.0-97.3 | 96.3    | 96.1-96.5 | 94.5     | 94.2-94.8 |
| Pulmonary disease                             | With    | 98.6          | 98.2-98.9 | 96.8    | 96.1-97.3 | 95.5    | 94.8-96.2 | 93.3     | 91.7-94.6 |

|                            |         |      |           |      |           |      |           |      |           |
|----------------------------|---------|------|-----------|------|-----------|------|-----------|------|-----------|
|                            | Without | 98.8 | 98.7-98.9 | 97.2 | 97.0-97.3 | 96.4 | 96.1-96.6 | 94.5 | 94.2-94.9 |
| Depression                 | With    | 97.9 | 96.5-98.7 | 95.4 | 93.4-96.7 | 92.8 | 90.2-94.7 | 89.9 | 85.9-92.9 |
|                            | Without | 98.8 | 98.7-98.9 | 97.2 | 97.0-97.3 | 96.4 | 96.1-96.5 | 94.5 | 94.2-94.8 |
| Psychotic disorders        | With    | 97.7 | 96.6-98.4 | 95.2 | 93.7-96.4 | 93.1 | 91.4-94.8 | 90.1 | 86.5-92.7 |
|                            | Without | 98.8 | 98.7-98.9 | 97.2 | 97.0-97.3 | 96.4 | 96.2-96.5 | 94.5 | 94.2-94.9 |
| Neurodegenerative diseases | With    | 98.4 | 97.3-99.0 | 96.4 | 94.9-97.5 | 95.1 | 93.1-96.5 | 94.0 | 91.3-95.9 |
|                            | Without | 98.8 | 98.7-98.9 | 97.2 | 97.0-97.3 | 96.3 | 96.1-96.5 | 94.5 | 94.1-94.5 |
| Any of the diseases        | With    | 98.6 | 98.4-98.7 | 96.7 | 96.5-96.9 | 95.9 | 95.6-96.1 | 94.2 | 93.7-94.6 |
|                            | Without | 99.1 | 98.9-99.2 | 97.5 | 97.3-97.7 | 96.7 | 96.5-97.0 | 94.7 | 94.3-95.2 |

---
